# Supplementary material for: Mechanical, electronic and catalytic properties of 2H–1T′ MoS2 heterointerfaces
Source: Royal Society of Chemistry journal article supplement (doi:10.1039/d2cp02258c), 2022-01-01
Supplement: d2cp02258c1.pdf [file d2cp02258c1.pdf]

## Supporting Information

### Mechanical, electronic and catalytic properties of 2H-1T' MoS<sub>2</sub> heterointerfaces

Xiangru Huang<sup>a,b</sup>, Yuan Chang<sup>a</sup>, Shi Qiu<sup>a</sup>, Hongsheng Liu<sup>\*a</sup>, Vitali Shymanski<sup>b</sup>  
and Junfeng Gao<sup>\*a,b</sup>

<sup>a</sup> *Key Laboratory of Materials Modification by Laser, Ion and Electron Beams  
(Dalian University of Technology), Ministry of Education, Dalian 116024,  
China. email: [gaojf@dlut.edu.cn](mailto:gaojf@dlut.edu.cn); [liuhongsheng@dlut.edu.cn](mailto:liuhongsheng@dlut.edu.cn)*

<sup>b</sup> *Dalian University of Technology and Belarusian State University Joint  
Institute- Innovation Center.*

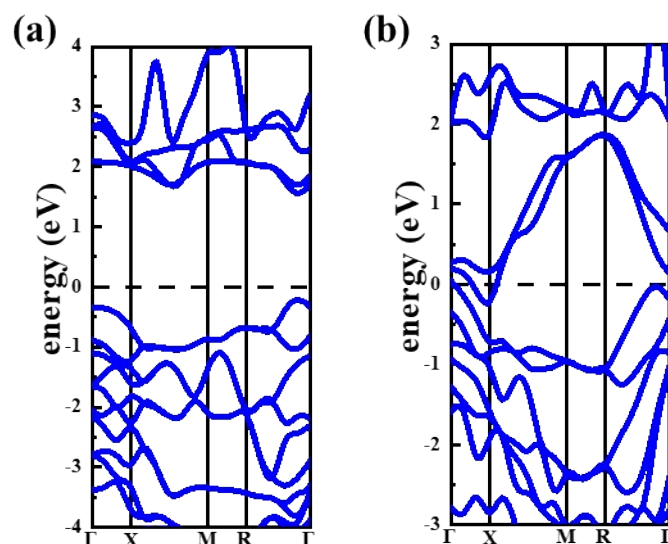

**Figure S1.** (a) Electronic band structure of 2H-MoS<sub>2</sub>. (b) Electronic band structure of 1T'-MoS<sub>2</sub>.

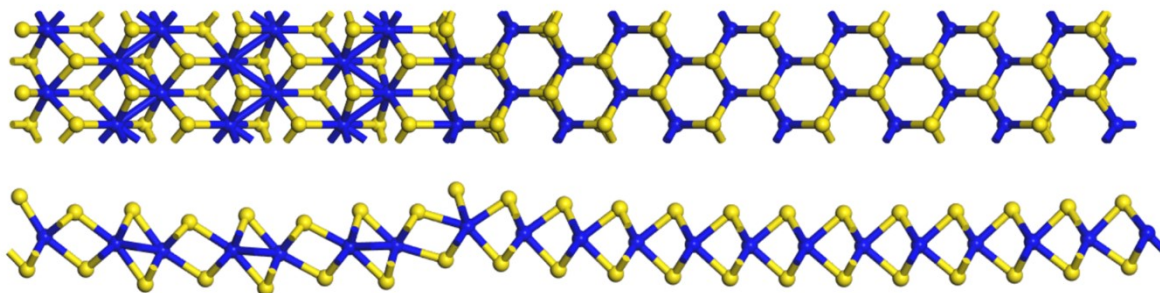

**Figure S2.** Top and side views of the S-LU-sint heterostructure by doubling the domain size of both 2H and 1T' phases in the manuscript.

**Table S1. Hydrogen chemisorption energy ( $\Delta E_H$ ), zero-point energy ( $\Delta E_{zero\ point}$ ), entropy and Gibbs free energy for hydrogen adsorbed on different sites of S-LU-sint**

| Site                            | $\Delta E_H$ (eV) | $\Delta E_{zero\ point}$ (eV) | $T\Delta S$ (eV) | $\Delta G$ (eV) |
|---------------------------------|-------------------|-------------------------------|------------------|-----------------|
| Interface                       | -0.271            | 0.249                         | 0.0057           | -0.028          |
| Far from interface in 1T' phase | -0.042            | 0.252                         | 0.006            | 0.204           |
| Near interface in 1T' phase     | 0.037             | 0.249                         | 0.007            | 0.279           |
| Near interface in 2H phase      | 1.395             | 0.219                         | 0.005            | 1.610           |
| Far from interface in 2H phase  | 1.378             | 0.219                         | 0.006            | 1.590           |
